# Supplementary material for: Contact Toxicity and Ovideterrent Activity of Three Essential Oil-Based Nano-Emulsions against the Olive Fruit Fly Bactrocera oleae
Source: MDPI journal article supplement (doi:10.3390/horticulturae8030240), 2022-03-10
Supplement: s1 [file s1]

# Contact Toxicity and Ovideterrent Activity of Three Essential Oil-Based Nano-Emulsions against the Olive Fruit Fly *Bactrocera oleae*

Giulia Giunti <sup>1,2,\*</sup>, Francesca Laudani <sup>2</sup>, Emilio Lo Presti <sup>2</sup>, Monica Bacchi <sup>2</sup>, Vincenzo Palmeri <sup>2</sup> and Orlando Campolo <sup>2</sup>

<sup>1</sup> Department of Pharmacy, University of Salerno, Via Giovanni Paolo II 132, 84084 Fisciano, Italy

<sup>2</sup> Department of Agriculture, Mediterranean University of Reggio Calabria, Loc. Feo di Vito, 89122 Reggio Calabria, Italy; francesca.laudani@unirc.it (F.L.); emilio.lopresti@unirc.it (E.L.P.); mbacchi@unirc.it (M.B.); vpalmeri@unirc.it (V.P.); orlando.campolo@unirc.it (O.C.)

\* Correspondence: ggiunti@unisa.it

**Abstract:** The control strategies for the olive crop key pest, *Bactrocera oleae*, involve synthetic chemical insecticides and few eco-sustainable alternatives, such as ovideterrents and lures. In the last few decades, the interest concerning the formulation of botanical based biopesticides increased, but little research investigated the suitability of these approaches for *B. oleae* control. This research aimed to investigate the residual contact toxicity and the oviposition deterrence of three essential oil (EO)-based nano-emulsions (*Pimpinella anisum*, *Foeniculum vulgare*, *Mentha x piperita*) against *B. oleae* adult flies. All the nano-emulsions possessed optimal physical characteristics, with droplets dimensions ranging from 115 to 152 nm and low PDI values (<0.2), even after 1 year of storage. Although no notable residual contact toxicity was noted, all the tested formulations reduced the number of oviposition puncture in no-choice tests (percent repellence: mint < fennel < anise). In choice trials, olives treated with fennel and anise EO-formulations at the highest concentration (7.5%, 75 g of EO/L) were less attractive respect to control fruits and a significant reduction of olive punctures was recorded. Nano-biopesticides are promising eco-friendly tools to integrate *B. oleae* pest management programs and to reduce the use of harmful conventional active ingredients.

**Keywords:** nano-insecticide; botanical; repellence; Tephritidae; IPM

**Table S1.** GC-MS analysis of the anise (*Pimpinella anisum*) essential oil.

LRI= Linear Retention Index. NI= Not Identified. tr=traces.

| Compound                       | LRI Calculated | LRI Literature | Peak Area (%) |
|--------------------------------|----------------|----------------|---------------|
| Anisole                        | 921            | 917            | tr            |
| $\alpha$ -Thujene              | 925            | 931            | 0.01          |
| $\alpha$ -Pinene               | 931            | 939            | 0.69          |
| Camphene                       | 947            | 953            | 0.02          |
| Linaloyl oxide                 | 969            | 971            | 0.01          |
| Sabinene                       | 972            | 976            | 0.05          |
| $\beta$ -Pinene                | 976            | 980            | 0.17          |
| $\beta$ -Myrcene               | 990            | 991            | 0.09          |
| $\alpha$ -Phellandrene         | 1005           | 1005           | 0.35          |
| $\delta$ -3-Carene             | 1010           | 1011           | 0.18          |
| $\alpha$ -Terpinene            | 1016           | 1018           | 0.05          |
| o-Cymene                       | 1024           | 1022           | 0.14          |
| Limonene                       | 1027           | 1031           | 1.55          |
| Eucalyptol (1,8-Cineole)       | 1029           | 1033           | 0.29          |
| (Z)- $\beta$ -Ocimene          | 1036           | 1040           | 0.01          |
| (E)- $\beta$ -Ocimene          | 1047           | 1050           | 0.01          |
| $\gamma$ -Terpinene            | 1056           | 1062           | 0.20          |
| cis-Sabinene hydrate           | 1067           | 1068           | tr            |
| cis-Linalool oxide             | 1071           | 1070           | 0.02          |
| Terpinolene                    | 1088           | 1088           | 0.08          |
| Linalool                       | 1099           | 1098           | 2.51          |
| $\alpha$ -Fenchol              | 1114           | 1117           | 0.01          |
| trans-p-Mentha-2,8-dien-1-ol   | 1122           | 1125           | tr            |
| 2,4-Heptadienal, 2,4-dimethyl- | 1133           | 1129           | tr            |
| Pinocarveol                    | 1138           | 1137           | 0.01          |
| Camphor                        | 1143           | 1143           | 0.04          |
| Isopulegol                     | 1146           | 1145           | tr            |
| Menthone                       | 1153           | 1154           | 0.02          |
| Borneol                        | 1164           | 1165           | 0.03          |
| Isomenthone                    | 1167           | 1164           | 0.01          |
| Dihydro- $\gamma$ -Terpineol   | 1171           | 1178           | 0.04          |
| Terpinen-4-ol                  | 1175           | 1177           | 0.19          |
| $\alpha$ -Terpineol            | 1189           | 1192           | 0.15          |
| Estragole                      | 1198           | 1196           | 5.49          |
| Bornyl formate                 | 1228           | 1228           | 0.01          |
| Nerol                          | 1236           | 1228           | 0.01          |
| Neral                          | 1248           | 1240           | tr            |
| Linalyl acetate                | 1252           | 1257           | 1.28          |
| (Z)-Anethole                   | 1257           | 1258           | 0.10          |
| p-Anisaldehyde                 | 1266           | 1263           | 0.06          |
| <b>NI 1</b>                    | <b>1270</b>    |                | <b>0.02</b>   |
| Geranial                       | 1276           | 1270           | 0.03          |

|                             |             |      |             |
|-----------------------------|-------------|------|-------------|
| (E)-Anethole                | 1294        | 1283 | 82.51       |
| δ-Elemene                   | 1334        | 1339 | tr          |
| α-Terpinyyl acetate         | 1346        | 1350 | 0.04        |
| Neryl acetate               | 1363        | 1365 | 0.03        |
| Isoledene                   | 1369        | 1373 | tr          |
| α-Copaene                   | 1372        | 1376 | 0.09        |
| Geranyl acetate             | 1383        | 1383 | 0.02        |
| β-Elemene                   | 1388        | 1392 | 0.02        |
| <b>NI 2</b>                 | <b>1402</b> |      | <b>0.01</b> |
| α-Gurjunene                 | 1405        | 1409 | 0.02        |
| cis-α-Bergamotene           | 1410        | 1415 | 0.08        |
| Caryophyllene               | 1415        | 1418 | 0.47        |
| β-Gurjunene                 | 1423        | 1432 | tr          |
| trans-α-Bergamotene         | 1431        | 1439 | 0.52        |
| Aromadendrene               | 1434        | 1439 | 0.04        |
| <b>NI 3</b>                 | <b>1438</b> |      | <b>0.01</b> |
| α-Humulene                  | 1449        | 1454 | 0.04        |
| (E)-β-Farnesene             | 1453        | 1458 | 0.07        |
| Alloaromadendrene           | 1456        | 1461 | 0.01        |
| <b>NI 4</b>                 | <b>1469</b> |      | <b>0.01</b> |
| γ-Murolene                  | 1472        | 1477 | 0.01        |
| Germacrene D                | 1477        | 1480 | tr          |
| (Z-E)-α-Farnesene           | 1480        | 1482 | tr          |
| β-Selinene                  | 1482        | 1485 | tr          |
| <b>NI 5</b>                 | <b>1484</b> |      | <b>0.01</b> |
| cis-β-Guaiene               | 1487        | 1490 | tr          |
| Viridiflorene               | 1492        | 1493 | 0.12        |
| α-Murolene                  | 1496        | 1499 | 0.01        |
| (Z)-α-Bisabolene            | 1504        | 1504 | 0.13        |
| cis-γ-Cadinene              | 1510        | 1514 | 0.03        |
| δ-Cadinene                  | 1519        | 1524 | 0.07        |
| Cadina-1,4-diene            | 1528        | 1532 | tr          |
| α-Cadinene                  | 1534        | 1538 | 0.01        |
| Elemol                      | 1546        | 1549 | 0.01        |
| Ledol                       | 1556        | 1565 | tr          |
| (E)-Nerolidol               | 1563        | 1564 | 0.08        |
| Spathuneol                  | 1574        | 1576 | 0.02        |
| Globulol                    | 1580        | 1583 | 0.05        |
| Viridiflorol                | 1588        | 1590 | 0.03        |
| Guaiol                      | 1590        | 1595 | 0.02        |
| Rosifoliol                  | 1598        | 1599 | 0.02        |
| Carotol                     | 1611        | 1612 | tr          |
| epi-γ-Eudesmol              | 1620        | 1622 | tr          |
| epi-Cubenol                 | 1624        | 1627 | tr          |
| γ-Eudesmol                  | 1629        | 1630 | 0.02        |
| epi-α-Muurolol (T-MuuroloI) | 1639        | 1641 | 0.04        |

|                         |      |      |              |
|-------------------------|------|------|--------------|
| $\alpha$ -Muurolol      | 1643 | 1645 | 0.01         |
| $\beta$ -Eudesmol       | 1648 | 1649 | 0.01         |
| $\alpha$ -Cadinol       | 1652 | 1653 | 0.08         |
| Foeniculin              | 1679 | 1684 | 1.29         |
| <b>TOTAL IDENTIFIED</b> |      |      | <b>99.93</b> |

**Table S2.** GC-MS analysis of the fennel (*Foeniculum vulgare*) essential oil.

LRI= Linear Retention Index. NI= Not Identified. tr= traces.

| Compound                     | LRI<br>Calculated | LRI<br>Literature | Peak Area<br>(%) |
|------------------------------|-------------------|-------------------|------------------|
| Tricyclene                   | 923               | 926               | 0.01             |
| $\alpha$ -Thujene            | 926               | 931               | 0.05             |
| $\alpha$ -Pinene             | 933               | 939               | 2.79             |
| Camphene                     | 948               | 953               | 0.39             |
| Thuja-2,4(10)-diene          | 954               | 957               | tr               |
| Sabinene                     | 973               | 976               | 0.13             |
| $\beta$ -Pinene              | 977               | 980               | 1.06             |
| $\beta$ -Myrcene             | 990               | 991               | 1.21             |
| $\alpha$ -Phellandrene       | 1006              | 1005              | 3.33             |
| $\delta$ -3-Carene           | 1011              | 1011              | 0.36             |
| $\alpha$ -Terpinene          | 1017              | 1018              | 0.46             |
| o-Cymene                     | 1025              | 1022              | 2.43             |
| Limonene                     | 1031              | 1031              | 23.98            |
| (Z)- $\beta$ -Ocimene        | 1036              | 1040              | 0.68             |
| (E)- $\beta$ -Ocimene        | 1047              | 1050              | 0.06             |
| $\gamma$ -Terpinene          | 1058              | 1062              | 0.19             |
| cis-Sabinene hydrate         | 1067              | 1068              | tr               |
| cis-Linalool oxide           | 1072              | 1070              | 0.01             |
| Fenchone                     | 1090              | 1090              | 10.14            |
| Linalool                     | 1099              | 1098              | 0.82             |
| $\alpha$ -Pinene oxide       | 1108              | 1105              | tr               |
| $\alpha$ -Fenchol            | 1113              | 1117              | 0.04             |
| $\beta$ -Fenchol             | 1118              | 1122              | 0.01             |
| trans-p-Mentha-2,8-dien-1-ol | 1121              | 1125              | 0.08             |
| Allo-Ocimene                 | 1130              | 1132              | 0.01             |
| cis-limonene oxide           | 1133              | 1134              | 0.03             |
| cis-p-Mentha-2,8-dien-1-ol   | 1135              | 1138              | 0.05             |
| trans-limonene oxide         | 1138              | 1139              | 0.03             |
| trans-Pinocarveol            | 1139              | 1139              | 0.03             |
| Camphor                      | 1144              | 1143              | 0.19             |
| Menthone                     | 1155              | 1154              | tr               |
| Borneol                      | 1165              | 1165              | 0.01             |
| 3-Thujanol                   | 1169              | 1166              | 0.01             |
| Dihydro- $\gamma$ -Terpineol | 1172              | 1178              | 0.04             |
| Terpinen-4-ol                | 1176              | 1177              | 0.16             |
| p-Cymen-8-ol                 | 1186              | 1183              | 0.04             |
| $\alpha$ -Terpineol          | 1190              | 1192              | 0.17             |
| Estragole                    | 1198              | 1196              | 3.15             |
| trans-Dihydrocarvone         | 1202              | 1201              | 0.27             |
| trans-Piperitol              | 1208              | 1205              | 0.01             |
| $\alpha$ -Fenchyl acetate    | 1218              | 1220              | 0.01             |

|                              |             |      |             |
|------------------------------|-------------|------|-------------|
| trans-Carveol                | 1220        | 1217 | 0.02        |
| 2-Hydroxy-1,8-cineole        | 1224        | 1229 | 0.02        |
| $\beta$ -Fenchyl acetate     | 1232        | 1232 | 0.05        |
| Nerol                        | 1235        | 1228 | 0.01        |
| cis-Carveol                  | 1239        | 1233 | 0.01        |
| Carvone                      | 1245        | 1242 | 0.02        |
| (Z)-Anethole                 | 1253        | 1258 | 0.21        |
| p-Anisaldehyde               | 1260        | 1263 | 0.24        |
| <b>NI 1</b>                  | <b>1271</b> |      | <b>0.02</b> |
| (E)-Anethole                 | 1290        | 1283 | 43.81       |
| 2,3-Pinenediol               | 1315        | 1319 | 0.27        |
| <b>NI 2</b>                  | <b>1340</b> |      | <b>0.02</b> |
| $\delta$ -Elemene            | 1346        | 1339 | tr          |
| Euguenol                     | 1356        | 1356 | 0.99        |
| $\alpha$ -Copaene            | 1372        | 1376 | 0.08        |
| Geranyl acetate              | 1381        | 1383 | 0.01        |
| $\beta$ -Cubebene            | 1386        | 1390 | 0.01        |
| $\beta$ -Elemene             | 1388        | 1391 | 0.03        |
| <b>NI 3</b>                  | <b>1395</b> |      | <b>0.03</b> |
| cis- $\alpha$ -Bergamotene   | 1410        | 1415 | 0.03        |
| Caryophyllene                | 1415        | 1418 | 0.25        |
| $\beta$ -Copaene             | 1424        | 1429 | 0.01        |
| trans- $\alpha$ -Bergamotene | 1431        | 1439 | 0.23        |
| Aromadendrene                | 1434        | 1439 | 0.02        |
| $\alpha$ -Humulene           | 1449        | 1454 | 0.03        |
| (E)- $\beta$ -Famesene       | 1454        | 1458 | 0.04        |
| Alloaromadendrene            | 1455        | 1461 | 0.01        |
| $\gamma$ -Muurolene          | 1472        | 1477 | tr          |
| Germacrene D                 | 1477        | 1480 | 0.03        |
| $\gamma$ -Curcumene          | 1480        | 1480 | 0.01        |
| <b>NI 4</b>                  | <b>1482</b> |      | <b>0.01</b> |
| Valencene                    | 1489        | 1496 | tr          |
| Viridiflorene                | 1491        | 1493 | 0.03        |
| $\alpha$ -Muurolene          | 1496        | 1499 | 0.01        |
| (Z)- $\alpha$ -Bisabolene    | 1504        | 1504 | 0.04        |
| cis- $\gamma$ -Cadinene      | 1510        | 1514 | 0.01        |
| $\delta$ -Cadinene           | 1519        | 1524 | 0.05        |
| Eugenol acetate              | 1530        | 1524 | 0.03        |
| Elemol                       | 1546        | 1549 | 0.01        |
| (E)-Nerolidol                | 1561        | 1564 | 0.04        |
| Spathuneol                   | 1574        | 1576 | 0.03        |
| $\beta$ -Caryophyllene oxide | 1579        | 1581 | 0.06        |
| Viridiflorol                 | 1588        | 1590 | 0.02        |
| Guaiol                       | 1590        | 1595 | 0.01        |
| Rosifoliol                   | 1598        | 1599 | 0.01        |
| epi- $\gamma$ -Eudesmol      | 1619        | 1622 | tr          |

|                                                            |             |      |             |
|------------------------------------------------------------|-------------|------|-------------|
| epi-Cubenol                                                | 1624        | 1627 | tr          |
| $\gamma$ -Eudesmol                                         | 1629        | 1630 | 0.01        |
| epi- $\alpha$ -Muurolol (T-MuurololI)                      | 1639        | 1641 | 0.02        |
| $\alpha$ -Muurolol                                         | 1644        | 1645 | tr          |
| $\beta$ -Eudesmol                                          | 1648        | 1649 | tr          |
| $\alpha$ -Cadinol                                          | 1652        | 1653 | 0.04        |
| Foeniculin (1-(3-Methyl-2-butenoxy)-4-(1-propenyl)benzene) | 1680        | 1684 | 0.54        |
| <b>NI 5</b>                                                | <b>1789</b> |      | <b>0.01</b> |
| <b>TOTAL IDENTIFIED</b>                                    |             |      | <b>98.4</b> |

**Table S3.** GC-MS analysis of the mint (*Mentha × piperita*) essential oil.

LRI= Linear Retention Index. NI= Not Identified. tr= traces.

| Compound                               | LRI Calculated | LRI Literature | Peak Area (%) |
|----------------------------------------|----------------|----------------|---------------|
| 2,5-Diethyltetrahydrofuran             | 898            | 898            | 0.03          |
| Anisole                                | 919            | 917            | 0.01          |
| $\alpha$ -Thujene                      | 925            | 931            | 0.03          |
| $\alpha$ -Pinene                       | 932            | 939            | 0.99          |
| Camphene                               | 948            | 953            | 0.02          |
| Dehydrosabinene                        | 951            | 957            | 0.02          |
| Sabinene                               | 972            | 976            | 0.4           |
| $\beta$ -Pinene                        | 977            | 980            | 1.25          |
| 2-Menthene                             | 983            | 985            | 0.01          |
| $\beta$ -Myrcene                       | 990            | 991            | 0.3           |
| 3-Octanol                              | 995            | 993            | 0.37          |
| p-Mentha-1(7),8-diene (Pseudolimonene) | 1005           | 1004           | 0.02          |
| $\delta$ -3-Carene                     | 1011           | 1011           | 0.01          |
| $\alpha$ -Terpinene                    | 1017           | 1018           | 0.04          |
| o-Cymene                               | 1024           | 1022           | 0.12          |
| Limonene                               | 1028           | 1031           | 3.64          |
| Eucalyptol (1,8-Cineole)               | 1031           | 1033           | 4.73          |
| (Z)- $\beta$ -Ocimene                  | 1036           | 1040           | 0.04          |
| (E)- $\beta$ -Ocimene                  | 1047           | 1050           | 0.03          |
| $\gamma$ -Terpinene                    | 1057           | 1062           | 0.08          |
| cis-Sabinene hydrate                   | 1066           | 1068           | 0.19          |
| 1-Octanol                              | 1071           | 1070           | 0.09          |
| Terpinolene                            | 1088           | 1088           | 0.06          |
| 3-Nonanol                              | 1098           | 1099           | 0.01          |
| Linalool                               | 1100           | 1098           | 0.2           |
| Isopentyl isovalerate                  | 1107           | 1103           | 0.02          |
| $\beta$ -Thujone                       | 1117           | 1114           | 0.01          |
| trans-p-Mentha-2,8-dien-1-ol           | 1121           | 1125           | 0.06          |
| cis-p-Mentha-2,8-dien-1-ol             | 1136           | 1138           | 0.03          |
| cis-Sabinol                            | 1141           | 1143           | 0.1           |
| Isopulegol                             | 1145           | 1145           | 1.52          |
| Menthone                               | 1156           | 1154           | 18.23         |
| Isomenthone                            | 1166           | 1164           | 13.56         |
| Lavandulol                             | 1168           | 1166           | 0.16          |
| Menthol                                | 1179           | 1173           | 36.72         |
| Isomenthol                             | 1184           | 1178           | 1.05          |
| Neoisomenthol                          | 1189           | 1183           | 0.24          |
| $\alpha$ -Terpineol                    | 1191           | 1192           | 0.48          |
| Estragole                              | 1197           | 1196           | 0.05          |
| trans-Dihydrocarvone                   | 1202           | 1201           | 0.04          |
| trans-Piperitol                        | 1206           | 1205           | tr            |
| <b>NI 1</b>                            | <b>1212</b>    |                | <b>0.02</b>   |



|                              |             |      |             |
|------------------------------|-------------|------|-------------|
| <b>NI 2</b>                  | <b>1214</b> |      | <b>0.07</b> |
| trans-Carveol                | 1221        | 1217 | 0.02        |
| Citronellol                  | 1230        | 1228 | 0.01        |
| cis-3-Hexenyl isovalerate    | 1234        | 1238 | 0.01        |
| Pulegone                     | 1238        | 1237 | 1.2         |
| Carvone                      | 1244        | 1242 | 0.06        |
| Piperitone                   | 1253        | 1252 | 1.02        |
| Neomenthol acetate           | 1272        | 1275 | 0.19        |
| (E)-Anethole                 | 1284        | 1283 | 2.64        |
| Menthyl acetate              | 1292        | 1294 | 5.79        |
| Isomenthol acetate           | 1306        | 1305 | 0.06        |
| cis-Pinocarvyl acetate       | 1310        | 1309 | 0.01        |
| <b>NI 3</b>                  | <b>1317</b> |      | <b>0.01</b> |
| <b>NI 4</b>                  | <b>1324</b> |      | <b>tr</b>   |
| $\delta$ -Elemene            | 1333        | 1339 | 0.07        |
| $\alpha$ -Cubebene           | 1346        | 1351 | tr          |
| Euguenol                     | 1348        | 1356 | 0.01        |
| Piperitone oxide             | 1350        | 1363 | 0.01        |
| $\alpha$ -Ylangene           | 1367        | 1372 | 0.01        |
| $\alpha$ -Copaene            | 1371        | 1376 | 0.04        |
| $\beta$ -Bourbonene          | 1381        | 1384 | 0.34        |
| $\beta$ -Cubebene            | 1386        | 1390 | 0.01        |
| $\beta$ -Elemene             | 1388        | 1392 | 0.1         |
| Longifolene                  | 1395        | 1402 | 0.01        |
| Isocaryophyllene             | 1402        | 1404 | 0.01        |
| $\alpha$ -Gurjunene          | 1405        | 1409 | 0           |
| cis- $\alpha$ -Bergamotene   | 1410        | 1415 | 0           |
| Caryophyllene                | 1415        | 1418 | 1.55        |
| $\beta$ -Copaene             | 1424        | 1432 | 0.09        |
| trans- $\alpha$ -Bergamotene | 1431        | 1439 | 0.02        |
| Aromadendrene                | 1434        | 1439 | 0.01        |
| (E)-geranylacetone           | 1440        | 1453 | 0.05        |
| $\alpha$ -Humulene           | 1445        | 1454 | tr          |
| $\alpha$ -Patchulene         | 1449        | 1456 | 0.21        |
| (E)- $\beta$ -Farnesene      | 1453        | 1458 | 0.04        |
| Alloaromadendrene            | 1456        | 1461 | 0.02        |
| $\alpha$ -Acoradiene         | 1459        | 1463 | 0.01        |
| $\gamma$ -Gurjunene          | 1462        | 1473 | 0.03        |
| $\gamma$ -Muurolene          | 1472        | 1477 | 0.04        |
| Germacrene D                 | 1477        | 1480 | 0.52        |
| $\beta$ -Selinene            | 1482        | 1485 | tr          |
| Valencene                    | 1492        | 1491 | 0.26        |
| $\alpha$ -Muurolene          | 1496        | 1499 | 0.03        |
| <b>NI 5</b>                  | <b>1501</b> |      | <b>0.01</b> |
| cis- $\gamma$ -Cadinene      | 1510        | 1514 | 0.03        |
| Cubebol                      | 1513        | 1515 | 0.01        |

|                                    |      |      |             |
|------------------------------------|------|------|-------------|
| $\delta$ -Cadinene                 | 1519 | 1524 | 0.11        |
| Cadina-1,4-diene                   | 1529 | 1532 | tr          |
| $\alpha$ -Cadinene                 | 1534 | 1538 | 0.01        |
| $\alpha$ -Calacorene               | 1541 | 1542 | tr          |
| Sesquisabinene hydrate             | 1549 | 1547 | 0.01        |
| Aromadendrene epoxide              | 1563 | 1590 | tr          |
| Spathuneol                         | 1575 | 1576 | 0.04        |
| $\beta$ -Caryophyllene oxide       | 1579 | 1581 | 0.12        |
| Viridiflorol                       | 1589 | 1590 | 0.05        |
| $\alpha$ -Humulene oxide           | 1606 | 1606 | 0           |
| epi-Cubenol                        | 1626 | 1627 | 0           |
| epi- $\alpha$ -Cadinol (T-Cadinol) | 1641 | 1640 | 0.02        |
| $\alpha$ -Cadinol                  | 1655 | 1653 | 0.01        |
| <b>TOTAL IDENTIFIED</b>            |      |      | <b>98.7</b> |
